# Supplementary material for: Oral Administration of Water Extract from Euglena gracilis Alters the Intestinal Microbiota and Prevents Lung Carcinoma Growth in Mice
Source: MDPI journal article supplement (doi:10.3390/nu14030678), 2022-02-05
Supplement: s1 [file s1]

## Supplementary Materials

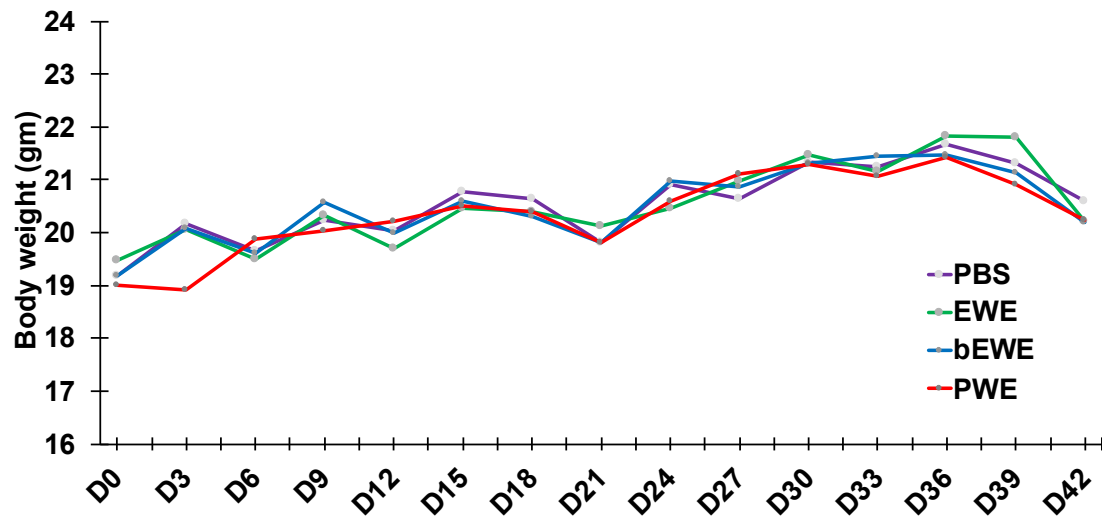

**Figure S1.** Treatment of mice with water extracts from *E. gracilis* didn't alter the body weight. Body weight were  $20.6 \pm 0.6$ ,  $20.6 \pm 0.7$ ,  $20.6 \pm 0.6$ , and  $20.5 \pm 0.7$  g in average with PBS, EWE, bEWE, and PWE treatments, respectively.

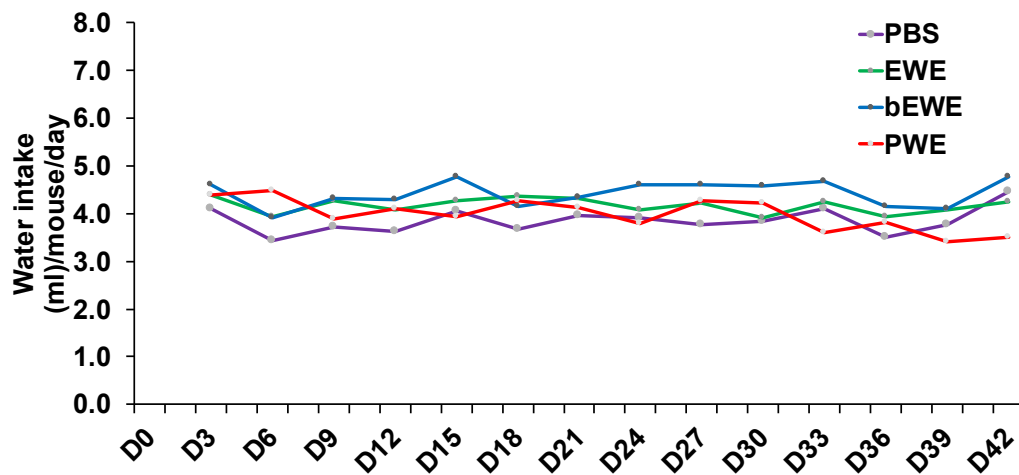

**Figure S2.** Consumption of water with different treatment was relatively consistent throughout the study. Water consumption were  $3.8 \pm 0.3$ ,  $4.2 \pm 0.2$ ,  $4.4 \pm 0.3$ ,  $4 \pm 0.3$  ml/mouse/day with PBS, EWE, bEWE, and PWE treatments, respectively.

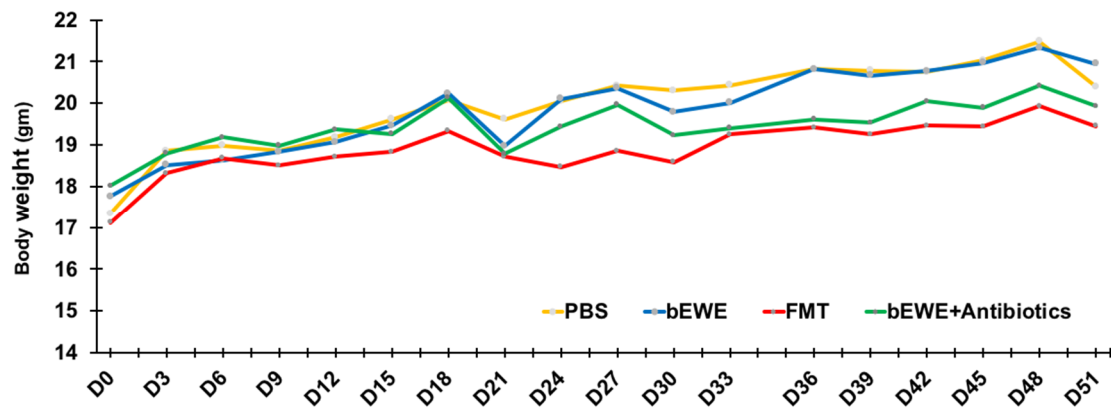

**Figure S3.** The body weight of mice treated with PBS, bEWE, FMT, or antibiotics was comparable. The average body weights at the end of the study period were  $19.9 \pm 1.0$ ,  $19.8 \pm 1.0$ ,  $18.9 \pm 0.6$ , and  $19.4 \pm 0.6$  g with PBS, bEWE, FMT, and bEWE + Antibiotics treatments, respectively.
